# Supplementary material
Source: PubMed Central journal article supplement (PMC11731107)
Supplement: NIHPP2024.03.25.586570v3-supplement-2.pdf [file NIHPP2024.03.25.586570v3-supplement-2.pdf]

**Supplemental Table 1 | qPCR primer list.**

| Housekeeping gene | Forward primer sequence (5'-3') | Reverse primer sequence (5'-3') |
|-------------------|---------------------------------|---------------------------------|
| <i>Gapdh</i>      | TGGATCTGACGTGCCGC               | TGCCTGCTTCACCACCTTC             |

| Negative control gene | Forward primer sequence (5'-3') | Reverse primer sequence (5'-3') |
|-----------------------|---------------------------------|---------------------------------|
| <i>Gfp</i>            | GAAGCGGATCACATGGT               | CCATGCCGAGAGTGATCC              |

| GPCR-encoding genes | Forward primer sequence (5'-3') | Reverse primer sequence (5'-3') |
|---------------------|---------------------------------|---------------------------------|
| <i>Adcyap1r1</i>    | TATGGACTTCAAGCACCGGC            | TCTTGCTCAGGATGGACAGC            |
| <i>Adora2a</i>      | GTTAGGTAGGCAGAGGGACAGG          | CTGCGATTGCTTCCCTTCTCTG          |
| <i>Adora2b</i>      | GGAACCGAGACTTCCGCTAC            | GACTGAGAGTAGACTGCGCC            |
| <i>Adrb1</i>        | CTACAACGACCCCAAGTGCT            | ACGTAGAAGGAGACGACGGA            |
| <i>Adrb2</i>        | TACACAGGGGAGCCAAACAC            | TCAACGCTAAGGCTAGGCAC            |
| <i>Adrb3</i>        | CAGGCTCTGTGTCTCTGGTTA           | GAGGAGACAGGGATGAAACCTC          |
| <i>Agtr1a</i>       | CTTAGGGTTGGAACCTGCGG            | TCATCCAGTCCCTCCCAACT            |
| <i>Bdkrb1</i>       | CCGCTACAGGTTGCTGGTAT            | TTGACGGAACGCAGAAGGAA            |

|               |                       |                           |
|---------------|-----------------------|---------------------------|
| <i>Cckar</i>  | ACTGCCAAGTCCACGTTCAA  | TCATCTGGGGCGTTCCAAAA      |
| <i>Chrm2</i>  | ACTGCCATTGCGGCTTTCTA  | TATTCTGCTCTTGCTCGCCC      |
| <i>Chrm4</i>  | GCCTCTGGCTAGTTCCGCC   | TCGCCATGCTGAACCCAAC       |
| <i>Drd2</i>   | GACACCACTCAAGGGCAACT  | ATCCATTCTCCGCCTGTTCA      |
| <i>Drd5</i>   | CGAACCTACGCCATCTCCTC  | GCGCGTGTAGGTCACTATCA      |
| <i>Gabbr2</i> | ACAGGCGATTCCAGTTCACA  | CGTAGGCGGTGGTTTTCTGA      |
| <i>Gpr3</i>   | ATCTACGCCTTTTCGCAACCA | CGGGACCGGAATGGAATCTT      |
| <i>Gpr65</i>  | CATGGGCTACGCAATACCCT  | TGTTTTCCGTGGCTTGTTG       |
| <i>Gpr68</i>  | ACGATACCAGCCCAAGTGTG  | CACCTTAACCAGTCCTCTGGC     |
| <i>Grm4</i>   | TACCAGTACCAACGTCGCAA  | GCATCCGCTCTATTCTGAGGT     |
| <i>Grm8</i>   | TGTGCTCCTAACGGGGATTT  | GATGATTGTGTCAGGTGCCG      |
| <i>Hcar1</i>  | AGTGTGAAGGAAACCGTGGG  | CGCTTTTCTCAGCCATGCAA      |
| <i>Hcar2</i>  | GCGGCCATCATTCTTGCTT   | GCCTCGCCATTTTTGGTCAT      |
| <i>Hrh3</i>   | TTAGAGCATCAACCCGGCAG  | CACTCCAGTTCCACCAACGA      |
| <i>Htr7</i>   | GTGGTCAAATGGGAAACGGA  | CCATTCTGCCTCACGGGGTA      |
| <i>Lpar2</i>  | GGCAGATGACTTGACTTCGC  | GCCTCCCTGAATGTTTGCTC      |
| <i>Oprd1</i>  | TGGATGCTTTTGGGGTTCCT  | AAACAAAGGGTCTCGGTGCT      |
| <i>Opr1</i>   | TCCTCAGGCACACCAAGATG  | GAAGGGCAGTGTGAGCAAGA      |
| <i>P2ry12</i> | AACGCCAGTGCATTTGCTG   | TCTCCTTTTATTCTTGCACTGTGAC |
| <i>Pthr1</i>  | AGCGAGTGCCTCAAGTTCAT  | TCCCACGGTGTAGATCATGC      |

|              |                       |                       |
|--------------|-----------------------|-----------------------|
| <i>S1pr5</i> | AACTCGCTGCTGAATCCCAT  | GGAGGAGTCTTGGTTGCAGG  |
| <i>Tacr1</i> | AGGTGTCTGGGGGTTTCTTTA | CCTAGAAGTGACAGGTGACCA |

| <b>Immediate-early genes</b> | <b>Forward primer sequence (5'-3')</b> | <b>Reverse primer sequence (5'-3')</b> |
|------------------------------|----------------------------------------|----------------------------------------|
| <i>ΔFosB</i>                 | AGGCAGAGCTGGAGTCGGAGAT                 | GCCGAGGACTTGAACCTCACTCG                |
| <i>c-Fos</i>                 | CCTGCCCTTCTCAACGAC                     | GCTCCACGTTGCTGATGCT                    |
| <i>Egr1</i>                  | GCCGAGCGAACAACCCTAT                    | TCCACCATCGCCTTCTCATT                   |
| <i>NPas4</i>                 | GCTATACTCAGAAGGTCCAGAAGG<br>C          | TCAGAGAATGAGGGTAGCACAGC                |

| <b>Ion channel-encoding genes</b> | <b>Forward primer sequence (5'-3')</b> | <b>Reverse primer sequence (5'-3')</b> |
|-----------------------------------|----------------------------------------|----------------------------------------|
| <i>Cacna1d</i> (isof.1)           | GCTCGGTGGCTGTATTTTCAA                  | CCGTGCTTTCTACCGCACTT                   |
| <i>Cacna2d3</i>                   | GCAGATCGCAGGAAGCTTTG                   | ACGGGAGATTTCCGCTCATC                   |
| <i>Hcn1</i>                       | CGTGAAGCATGACCGAGAGA                   | GTAGACTGGCGGAGATTGGG                   |
| <i>Hcn2</i>                       | CATCCACACCAAAGCCATGC                   | CCCGCCTCCTAAGCTACCTA                   |
| <i>Kcna1</i>                      | TGCTGTGTGTCGCTCAATCT                   | TCTCCGAAGTGGACACTTGC                   |
| <i>Kcna2</i>                      | TACCCATCTGCAAGGGCAACG                  | CGACTTGAGGAGGAGAGTGGA                  |
| <i>Kcnab1</i>                     | TCTTGGACTGGTCCCCTACC                   | AGATTCCCCTACCCAGCAT                    |
| <i>Kcnb1</i>                      | GAGAGGGCGTGGCTAAGAAG                   | GCCCTCTTGGTCCATTCCA                    |
| <i>Kcnj14</i>                     | GCCGAGGACAGACCTGAACAC                  | ACTGGGGGTTCTCTGCTCA                    |

|                |                          |                         |
|----------------|--------------------------|-------------------------|
| <i>Kcnn3</i>   | ATCCACCGTCATCCTGCTTG     | GTAGGTCATGGCTATCCGCC    |
| <i>Kcnn2</i>   | ACAAGGCGTCGCTGTATTCT     | CTGTATTTCCCTGGCGTGGT    |
| <i>Kcnq2</i>   | GCCATTTTGTACGTGCCCTT     | TAGAAGACAGCGTCGTGTGC    |
| <i>Kcnq3</i>   | AGTCTTGCTTCCCTGGTGATTC   | TCGTCCTGCATTTGGCTGATA   |
| <i>Kcnq5</i>   | GCAGCCACCAGACTAAAGGA     | CTGCCGCTTCCAATTCCAAA    |
| <i>Kcnt2</i>   | CTGTGCACTTAAAAGCAATACAGT | AGCATTTTCCACATCCATGACT  |
| <i>Scn1a</i>   | TACAGAAGCAGACCGTAGGC     | TGTGATTAGCATCATTTTGGGCT |
| <i>Scn8a</i>   | CCTTCTTACGAGACCCGTGG     | ACCCTGAAAGTGCGTAGAGC    |
| <i>Tmem16f</i> | TGGAACCCTGATCTTCGCTG     | TTGCTGTAGCTCAACGGTGT    |
| <i>Trpm5</i>   | GAATGGGGACTACAGAGGCTG    | CGAATGTTTCCTGTGGAGGC    |

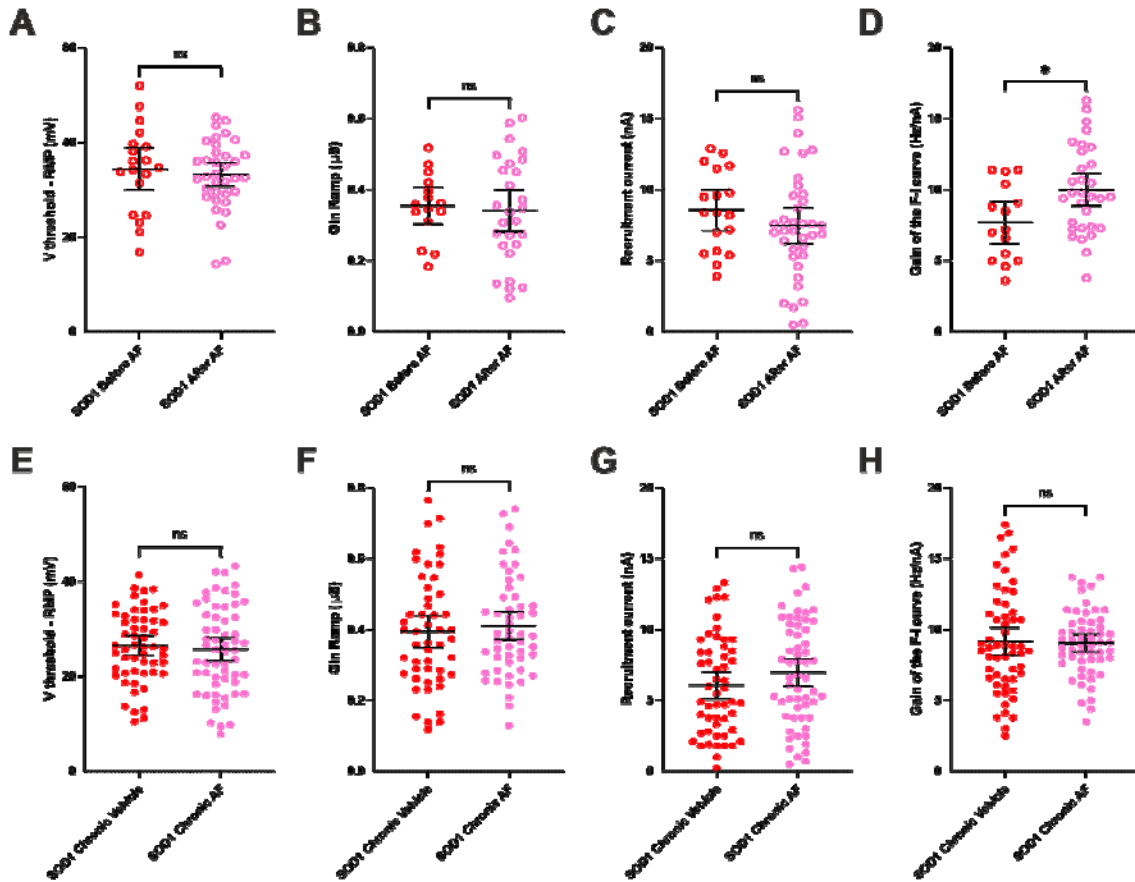

**Supplemental Figure 1 | Replication of electrophysiological findings upon acute and prolonged delivery of adrenergic  $\beta 2/\beta 3$  agonists on a different cohort of presymptomatic SOD1 mice. A-H)** Electrophysiological properties were obtained from slow ramps of current, as in Figure 4 and 7. **A-D)** Effect of the acute treatment on Voltage threshold - resting membrane potential (**A**), ramp input conductance (**B**), recruitment current (**C**), gain of the F-I relationship (**D**), in MNs from SOD1 mice. **E-H)** Effect of the chronic treatment on Voltage threshold - resting membrane potential (**E**), ramp input conductance (**F**), recruitment current (**G**), gain of the F-I relationship (**H**), in MNs from SOD1 mice. In all graphs, each point represents one MN and the mean  $\pm$  95% confidence intervals are shown. N = 7 Acute SOD1 mice and N = 11 Chronic SOD1 mice. \* $p < 0.05$ , ns - non significant.
